# Supplementary material for: Early Discontinuation and Restart of Insulin in the Treatment of Type 2 Diabetes Mellitus
Source: PubMed Central journal article supplement — Diabetes Ther. 2014 Apr 30;5(1):225–42. doi: 10.1007/s13300-014-0065-z (PMC4065305; doi:10.1007/s13300-014-0065-z), 2014-04-30
Supplement: 13300_2014_65_MOESM1_ESM.pdf [file 13300_2014_65_MOESM1_ESM.pdf]

- In this cohort of individuals with type 2 diabetes mellitus who initiated insulin therapy, the probability of discontinuation was 82.0% within the first year of therapy, and, among those who discontinued early, there was a 90.3% probability of restarting within the year.
- The study revealed a distinct set of observable characteristics that are associated with early discontinuation of insulin therapy as well as with restarting of insulin for the subgroup of patients who discontinued early.
- Early discontinuation of insulin therapy was associated with significantly higher acute care (hospitalization and emergency services) costs, although outpatient costs, drug costs and total costs were lower among patients who discontinued early. Among patients who discontinued early, restarting of insulin was associated with higher acute care costs as well as significantly higher outpatient costs, drug costs, and total costs.
- Current findings highlight the economic ramifications of early discontinuation of insulin therapy, particularly through the first 90 days post-initiation. In addition, this study revealed predictors of early discontinuation and restart—predictors which may be helpful in designing patient-centered interventions to enhance persistence on therapy. Such interventions may in turn help reduce healthcare costs and improve patients' long term outcomes.

This summary slide represents the opinions of the authors. Sponsorship for this study was funded by Eli Lilly and Company. Patricia Platt assisted in the writing of the manuscript and Joyce Healey, from Words With Joyce LLC, assisted in the editing of this manuscript. Both were compensated by HealthMetrics Outcomes research for their work on this project. For a full list of acknowledgments and conflicts of interest for all authors of this article, please see the full text online. Copyright © The Author(s) 2014. Creative Commons Attribution Noncommercial License (CC BY-NC).
